# Supplementary material for: The association between socioeconomic status and pandemic influenza: Systematic review and meta-analysis
Source: PubMed Central journal article supplement (PMC8423272; doi:10.1371/journal.pone.0244346), 2021-09-07
Supplement: pone.0244346.s004.pdf [file pone.0244346.s004.pdf]

## Medline search strategy

| #  | Searches                                                                                                                                                                                                                                                                                                                                                                                                                                        |
|----|-------------------------------------------------------------------------------------------------------------------------------------------------------------------------------------------------------------------------------------------------------------------------------------------------------------------------------------------------------------------------------------------------------------------------------------------------|
| 1  | Orthomyxoviridae/                                                                                                                                                                                                                                                                                                                                                                                                                               |
| 2  | Influenzavirus A/                                                                                                                                                                                                                                                                                                                                                                                                                               |
| 3  | Influenza A virus/                                                                                                                                                                                                                                                                                                                                                                                                                              |
| 4  | Influenza A Virus, H1N1 Subtype/                                                                                                                                                                                                                                                                                                                                                                                                                |
| 5  | Influenza A Virus, H1N2 Subtype/                                                                                                                                                                                                                                                                                                                                                                                                                |
| 6  | Influenza A Virus, H2N2 Subtype/                                                                                                                                                                                                                                                                                                                                                                                                                |
| 7  | Influenza A Virus, H3N2 Subtype/                                                                                                                                                                                                                                                                                                                                                                                                                |
| 8  | Influenza A Virus, H3N8 Subtype/                                                                                                                                                                                                                                                                                                                                                                                                                |
| 9  | Influenza Pandemic, 1918-1919/                                                                                                                                                                                                                                                                                                                                                                                                                  |
| 10 | Pandemics/                                                                                                                                                                                                                                                                                                                                                                                                                                      |
| 11 | Disease Outbreaks/                                                                                                                                                                                                                                                                                                                                                                                                                              |
| 12 | 1 or 2 or 3 or 4 or 5 or 6 or 7 or 8                                                                                                                                                                                                                                                                                                                                                                                                            |
| 13 | 10 or 11                                                                                                                                                                                                                                                                                                                                                                                                                                        |
| 14 | 12 and 13                                                                                                                                                                                                                                                                                                                                                                                                                                       |
| 15 | ((Influenza or flu) adj3 (pandemic* or outbreak* or epidemic*)).tw,kw,kf.                                                                                                                                                                                                                                                                                                                                                                       |
| 16 | ((Russian or Spanish or Asian or Hong Kong or Mexican) adj3 (flu or influenza or pandemic* or epidemic*)).tw,kw,kf.                                                                                                                                                                                                                                                                                                                             |
| 17 | ((H1N1 or H1N2 or H2N2 or H3N2 or H3N8) adj3 (pandemic* or outbreak* or epidemic*)).tw,kw,kf.                                                                                                                                                                                                                                                                                                                                                   |
| 18 | (PH1N1 or H1N1pdm09 or H1N1p).tw,kw,kf.                                                                                                                                                                                                                                                                                                                                                                                                         |
| 19 | (("1889" or 1889-90 or 1889-1890 or 1889-91 or 1889-1891 or 1889-92 or 1889-1892 or 1889-93 or 1889-1893 or 1889-94 or 1889-1894 or 1918-19 or 1918-1919 or 1918-20 or 1918-1920 or "1957" or "1958" or 1957-58 or 1957-1958 or "1968" or 1968-69 or 1968-1969 or 1968-70 or 1968-1970 or "1969" or 1969-70 or 1969-1970 or "1970" or "2009" or 2009-10 or 2009-2010) adj7 (flu or influenza or pandemic* or epidemic* or outbreak*)).tw,kw,kf. |
| 20 | 9 or 14 or 15 or 16 or 17 or 18 or 19                                                                                                                                                                                                                                                                                                                                                                                                           |
| 21 | Socioeconomic Factors/                                                                                                                                                                                                                                                                                                                                                                                                                          |
| 22 | Poverty/                                                                                                                                                                                                                                                                                                                                                                                                                                        |
| 23 | Poverty Areas/                                                                                                                                                                                                                                                                                                                                                                                                                                  |
| 24 | Working Poor/                                                                                                                                                                                                                                                                                                                                                                                                                                   |
| 25 | Social Class/                                                                                                                                                                                                                                                                                                                                                                                                                                   |
| 26 | Social Conditions/                                                                                                                                                                                                                                                                                                                                                                                                                              |
| 27 | Social Marginalization/                                                                                                                                                                                                                                                                                                                                                                                                                         |
| 28 | Social Isolation/                                                                                                                                                                                                                                                                                                                                                                                                                               |
| 29 | Educational Status/                                                                                                                                                                                                                                                                                                                                                                                                                             |
| 30 | Employment/                                                                                                                                                                                                                                                                                                                                                                                                                                     |

|    |                                                                                                                                                                                                                                                                                                                                                                     |
|----|---------------------------------------------------------------------------------------------------------------------------------------------------------------------------------------------------------------------------------------------------------------------------------------------------------------------------------------------------------------------|
| 31 | Medical Indigency/                                                                                                                                                                                                                                                                                                                                                  |
| 32 | Medically Uninsured/                                                                                                                                                                                                                                                                                                                                                |
| 33 | "Social Determinants of Health"/                                                                                                                                                                                                                                                                                                                                    |
| 34 | Vulnerable Populations/                                                                                                                                                                                                                                                                                                                                             |
| 35 | Minority Groups/                                                                                                                                                                                                                                                                                                                                                    |
| 36 | "Transients and Migrants"/                                                                                                                                                                                                                                                                                                                                          |
| 37 | Housing/                                                                                                                                                                                                                                                                                                                                                            |
| 38 | Crowding/                                                                                                                                                                                                                                                                                                                                                           |
| 39 | Indians, North American/                                                                                                                                                                                                                                                                                                                                            |
| 40 | Indians, Central American/                                                                                                                                                                                                                                                                                                                                          |
| 41 | Indians, South American/                                                                                                                                                                                                                                                                                                                                            |
| 42 | Inuits/                                                                                                                                                                                                                                                                                                                                                             |
| 43 | Alaska Natives/                                                                                                                                                                                                                                                                                                                                                     |
| 44 | Oceanic Ancestry Group/                                                                                                                                                                                                                                                                                                                                             |
| 45 | Refugees/                                                                                                                                                                                                                                                                                                                                                           |
| 46 | "Emigrants and Immigrants"/                                                                                                                                                                                                                                                                                                                                         |
| 47 | "Emigration and Immigration"/                                                                                                                                                                                                                                                                                                                                       |
| 48 | Ethnic Groups/                                                                                                                                                                                                                                                                                                                                                      |
| 49 | Demography/                                                                                                                                                                                                                                                                                                                                                         |
| 50 | ((social* or socioeconomic* or socio-economic* or sociodemographic* or socio-demographic* or socioecologic* or socio-ecologic* or economic*) adj3 (factor* or condition* or aspect* or impact* or indicator* or indice* or index* or disparit* or difference* or depriv* or inequalit* or justice or injustice or determin* or class* or status)) or SES).tw,kw,kf. |
| 51 | (Gini adj1 (coefficient or ratio or index)).tw,kw,kf.                                                                                                                                                                                                                                                                                                               |
| 52 | (health adj3 (inequalit* or difference* or disparit*)).tw,kw,kf.                                                                                                                                                                                                                                                                                                    |
| 53 | (living condition* or poverty or material deprivation* or crowding or housing or employment or unemployment or income* or wealth or social vulnerability or ((public or social) adj3 (welfare or security)) or working class or slum* or homelessness or homeownership or apartment size).tw,kw,kf.                                                                 |
| 54 | ((poor or vulnerable or underprivileged or disadvantaged or homeless or remote) adj3 (people or person* or group* or communit* or parish* or neighbourhood* or countr* or population* or area*)).tw,kw,kf.                                                                                                                                                          |
| 55 | (literacy or illiteracy or educat*).tw,kw,kf.                                                                                                                                                                                                                                                                                                                       |
| 56 | (Nativ* or immigrant* or refugee* or migrant* or minorit*).tw,kw,kf.                                                                                                                                                                                                                                                                                                |
| 57 | (indigenous or ethnic or American Indian* or Alaska native* or aborigin* or maori or inuit* or Yupik or Cupik or Inupiaq or Saint Lawrence Island Yupik or Unangax or Alutiiq or Eyak or Tlingit or Haida or Tsimshian or sami or eskimo* or Torres strait islander* or pacific islander* or pacific people or athabaskan).tw,kw,kf.                                |
| 58 | or/21-57                                                                                                                                                                                                                                                                                                                                                            |
| 59 | 20 and 58                                                                                                                                                                                                                                                                                                                                                           |

|    |                                                         |
|----|---------------------------------------------------------|
| 60 | limit 59 to (danish or english or norwegian or swedish) |
|----|---------------------------------------------------------|
