# Supplementary material for: The association between socioeconomic status and pandemic influenza: Systematic review and meta-analysis
Source: PubMed Central journal article supplement (PMC8423272; doi:10.1371/journal.pone.0244346), 2021-09-07
Supplement: pone.0244346.s005.pdf [file pone.0244346.s005.pdf]

| Studies                                       | Selection                                                                                                                       |                                                                                                                                      | Comparability                         |                                       |                                                | Data quality                            |                                                       | Sum score                                                                                                                                                                                                                                         | Included in the meta-analysis |
|-----------------------------------------------|---------------------------------------------------------------------------------------------------------------------------------|--------------------------------------------------------------------------------------------------------------------------------------|---------------------------------------|---------------------------------------|------------------------------------------------|-----------------------------------------|-------------------------------------------------------|---------------------------------------------------------------------------------------------------------------------------------------------------------------------------------------------------------------------------------------------------|-------------------------------|
|                                               | Broad and representative sample/pop of the exposed?<br>1=truly and somewhat<br>0=selected sub-groups and no description of pop. | Selection of non-exposed sample/pop<br>1=drawn from same community as the exposed<br>0=drawn from different source or no description | Confounder controls?<br>1=yes<br>0=no | Biological controls?<br>1=yes<br>0=no | SES Sig. beyond bio controls?<br>1=yes<br>0=no | Lab-confirmed outcome?<br>1=yes<br>0=no | Data aggregation level<br>1=individual<br>0=aggregate |                                                                                                                                                                                                                                                   |                               |
| Studies included in the narrative synthesis * |                                                                                                                                 |                                                                                                                                      |                                       |                                       |                                                |                                         |                                                       | <b>44 studies:</b><br>average=4.5<br>median=4<br>min=2, max=7<br><b>35 studies incl. in meta – analysis:</b><br>average=4.9<br>median=5<br>min=3, max=7<br><b>9 studies not part of meta-analysis:</b><br>average=3.1<br>median=3<br>min=2, max=4 | Yes=1<br>No=0                 |
| 2                                             | 1                                                                                                                               | 1                                                                                                                                    | 1                                     | 0                                     |                                                | 1                                       | 0                                                     | 4                                                                                                                                                                                                                                                 | 1                             |
| 3                                             | 1                                                                                                                               | 1                                                                                                                                    | 1                                     | 0                                     |                                                | 1                                       | 0                                                     | 4                                                                                                                                                                                                                                                 | 1                             |
| 4                                             | 1                                                                                                                               | 1                                                                                                                                    | 1                                     | 1                                     | 0                                              | 1                                       | 1                                                     | 6                                                                                                                                                                                                                                                 | 1                             |
| 6                                             | 1                                                                                                                               | 1                                                                                                                                    | 1                                     | 1                                     | 1                                              | 1                                       | 1                                                     | 7                                                                                                                                                                                                                                                 | 1                             |
| 7                                             | 1                                                                                                                               | 1                                                                                                                                    | 1                                     | 0                                     |                                                | 0                                       | 0                                                     | 3                                                                                                                                                                                                                                                 | 0                             |
| 10                                            | 1                                                                                                                               | 1                                                                                                                                    | 0                                     |                                       |                                                | 1                                       | 0                                                     | 3                                                                                                                                                                                                                                                 | 0                             |
| 11                                            | 1                                                                                                                               | 1                                                                                                                                    | 1                                     |                                       |                                                | 1                                       | 1                                                     | 5                                                                                                                                                                                                                                                 | 1                             |
| 12                                            | 1                                                                                                                               | 1                                                                                                                                    | 1                                     | 1                                     | 0                                              | 1                                       | 1                                                     | 6                                                                                                                                                                                                                                                 | 1                             |
| 13                                            | 1                                                                                                                               | 1                                                                                                                                    | 1                                     | 0                                     |                                                | 1                                       | 1                                                     | 5                                                                                                                                                                                                                                                 | 1                             |
| 14                                            | 1                                                                                                                               | 1                                                                                                                                    | 1                                     | 0                                     |                                                | 0                                       | 0                                                     | 3                                                                                                                                                                                                                                                 | 1                             |
| 15                                            | 1                                                                                                                               | 1                                                                                                                                    | 1                                     | 1                                     | 0                                              | 1                                       | 1                                                     | 6                                                                                                                                                                                                                                                 | 1                             |
| 16                                            | 1                                                                                                                               | 1                                                                                                                                    | 1                                     | 0                                     |                                                | 0                                       | 0                                                     | 3                                                                                                                                                                                                                                                 | 1                             |
| 17                                            | 1                                                                                                                               | 1                                                                                                                                    | 1                                     | 0                                     |                                                | 1                                       | 0                                                     | 4                                                                                                                                                                                                                                                 | 0                             |
| 18                                            | 1                                                                                                                               | 1                                                                                                                                    | 1                                     | 0                                     |                                                | 1                                       | 0                                                     | 4                                                                                                                                                                                                                                                 | 0                             |
| 19                                            | 1                                                                                                                               | 1                                                                                                                                    | 0                                     |                                       |                                                | 1                                       | 0                                                     | 3                                                                                                                                                                                                                                                 | 0                             |
| 21                                            | 1                                                                                                                               | 1                                                                                                                                    | 1                                     | 1                                     | 0                                              | 1                                       | 1                                                     | 6                                                                                                                                                                                                                                                 | 1                             |
| 23                                            | 1                                                                                                                               | 1                                                                                                                                    | 1                                     | 1                                     | 1                                              | 1                                       | 1                                                     | 7                                                                                                                                                                                                                                                 | 1                             |
| 24                                            | 1                                                                                                                               | 1                                                                                                                                    | 1                                     | 1                                     | 1                                              | 1                                       | 1                                                     | 7                                                                                                                                                                                                                                                 | 1                             |
| 26                                            | 1                                                                                                                               | 1                                                                                                                                    | 1                                     | 1                                     | 1                                              | 1                                       | 1                                                     | 7                                                                                                                                                                                                                                                 | 1                             |
| 28                                            | 1                                                                                                                               | 1                                                                                                                                    | 1                                     |                                       |                                                | 1                                       | 1                                                     | 5                                                                                                                                                                                                                                                 | 1                             |
| 29                                            | 1                                                                                                                               | 1                                                                                                                                    | 1                                     | 0                                     |                                                | 0                                       | 0                                                     | 3                                                                                                                                                                                                                                                 | 0                             |
| 30                                            | 1                                                                                                                               | 1                                                                                                                                    | 1                                     | 0                                     |                                                | 0                                       | 0                                                     | 3                                                                                                                                                                                                                                                 | 0                             |
| 31                                            | 1                                                                                                                               | 1                                                                                                                                    | 1                                     | 0                                     |                                                | 0                                       | 1                                                     | 4                                                                                                                                                                                                                                                 | 1                             |
| 34                                            | 1                                                                                                                               | 1                                                                                                                                    | 1                                     | 1                                     | 1                                              | 1                                       | 1                                                     | 7                                                                                                                                                                                                                                                 | 1                             |
| 35                                            | 1                                                                                                                               | 1                                                                                                                                    | 1                                     |                                       |                                                | 0                                       | 0                                                     | 3                                                                                                                                                                                                                                                 | 1                             |
| 36                                            | 1                                                                                                                               | 1                                                                                                                                    | 1                                     | 1                                     | 0                                              | 1                                       | 0                                                     | 5                                                                                                                                                                                                                                                 | 1                             |
| 37                                            | 1                                                                                                                               | 1                                                                                                                                    | 1                                     | 0                                     |                                                | 1                                       | 0                                                     | 4                                                                                                                                                                                                                                                 | 1                             |
| 38                                            | 1                                                                                                                               | 1                                                                                                                                    | 1                                     | 1                                     | 1                                              | 1                                       | 1                                                     | 7                                                                                                                                                                                                                                                 | 1                             |
| 39                                            | 1                                                                                                                               | 1                                                                                                                                    | 1                                     | 0                                     |                                                | 0                                       | 0                                                     | 3                                                                                                                                                                                                                                                 | 0                             |
| 40                                            | 1                                                                                                                               | 1                                                                                                                                    | 1                                     | 0                                     |                                                | 0                                       | 0                                                     | 3                                                                                                                                                                                                                                                 | 1                             |
| 41                                            | 1                                                                                                                               | 1                                                                                                                                    | 0                                     | 0                                     |                                                | 1                                       | 0                                                     | 3                                                                                                                                                                                                                                                 | 1                             |
| 42                                            | 1                                                                                                                               | 1                                                                                                                                    | 1                                     | 1                                     | 1                                              | 1                                       | 1                                                     | 7                                                                                                                                                                                                                                                 | 1                             |
| 44                                            | 1                                                                                                                               | 1                                                                                                                                    | 1                                     | 0                                     |                                                | 0                                       | 0                                                     | 3                                                                                                                                                                                                                                                 | 1                             |
| 45                                            | 1                                                                                                                               | 1                                                                                                                                    |                                       |                                       |                                                | 0                                       | 0                                                     | 2                                                                                                                                                                                                                                                 | 0                             |
| 48                                            | 1                                                                                                                               | 1                                                                                                                                    | 0                                     | 0                                     |                                                | 0                                       | 1                                                     | 3                                                                                                                                                                                                                                                 | 1                             |
| 49                                            | 1                                                                                                                               | 1                                                                                                                                    | 1                                     | 0                                     |                                                | 0                                       | 1                                                     | 4                                                                                                                                                                                                                                                 | 1                             |
| 50                                            | 1                                                                                                                               | 1                                                                                                                                    | 1                                     | 0                                     |                                                | 0                                       | 0                                                     | 3                                                                                                                                                                                                                                                 | 1                             |
| 51                                            | 1                                                                                                                               | 1                                                                                                                                    | 0                                     | 0                                     |                                                | 1                                       | 0                                                     | 3                                                                                                                                                                                                                                                 | 1                             |
| 52                                            | 1                                                                                                                               | 1                                                                                                                                    | 1                                     | 1                                     | 1                                              | 1                                       | 0                                                     | 6                                                                                                                                                                                                                                                 | 1                             |
| 53                                            | 1                                                                                                                               | 1                                                                                                                                    | 0                                     | 0                                     |                                                | 1                                       | 1                                                     | 4                                                                                                                                                                                                                                                 | 1                             |
| 55                                            | 1                                                                                                                               | 1                                                                                                                                    | 1                                     |                                       |                                                | 1                                       | 1                                                     | 5                                                                                                                                                                                                                                                 | 1                             |
| 57                                            | 1                                                                                                                               | 1                                                                                                                                    | 1                                     | 1                                     | 0                                              | 1                                       | 1                                                     | 6                                                                                                                                                                                                                                                 | 1                             |
| 58                                            | 1                                                                                                                               | 1                                                                                                                                    | 1                                     | 0                                     |                                                | 1                                       | 1                                                     | 5                                                                                                                                                                                                                                                 | 1                             |
| 59                                            | 1                                                                                                                               | 1                                                                                                                                    | 1                                     | 0                                     |                                                | 1                                       | 1                                                     | 5                                                                                                                                                                                                                                                 | 1                             |

\* These numbers correspond to the 59 studies from which we extracted data. In the data extraction phase, we removed an additional 15 studies. The final number of studies included in the narrative synthesis was therefore the 44 listed in this table, also see documentation in supporting information file no. 4.
